# Supplementary material
Source: PubMed Central journal article supplement (PMC9633385)
Supplement: NIHMS1827009-supplement-1827009_Sup_Info_File.pdf [file NIHMS1827009-supplement-1827009_Sup_Info_File.pdf]

**Directed differentiation of human pluripotent stem cells into diverse organ-specific mesenchyme of the digestive and respiratory systems.**

Keishi Kishimoto<sup>1, 2, 3</sup>, Kentaro Iwasawa<sup>1, 4</sup>, Alice Sorel<sup>1</sup>, Carlos Ferran-Heredia<sup>1</sup>, Lu Han<sup>1</sup>, Mitsuru Morimoto<sup>2, 3</sup>, James M Wells<sup>1</sup>, Takanori Takebe<sup>1, 4, 5</sup> and Aaron M Zorn<sup>1, 3, ✉</sup>

<sup>1</sup>Center for Stem Cell and Organoid Medicine (CuSTOM), Perinatal Institute, Division of Developmental Biology, Cincinnati Children's Hospital, Department of Pediatrics, University of Cincinnati, College of Medicine, Cincinnati, OH, 45229, USA

<sup>2</sup>Laboratory for Lung Development and Regeneration, RIKEN Center for Biosystems Dynamics Research (BDR), Kobe, 650-0047, Japan

<sup>3</sup>CuSTOM-RIKEN BDR Collaborative Laboratory, Cincinnati Children's Hospital, Cincinnati, OH, 45229, USA

<sup>4</sup>CuSTOM, Division of Gastroenterology, Hepatology and Nutrition, Cincinnati Children's Hospital, Department of Pediatrics, University of Cincinnati, College of Medicine, Cincinnati, OH, 45229, USA

<sup>5</sup>Institute of Research, Tokyo Medical and Dental University, Tokyo, Japan

✉ email: aaron.zorn@cchmc.org

Correspondence and requests for materials should be addressed to A.M.Z.

**Contents:** Supplementary Figures 1-3

# Supplementary Figure 1

**a**

Marker gene expression in mesoderm at mouse E9.5

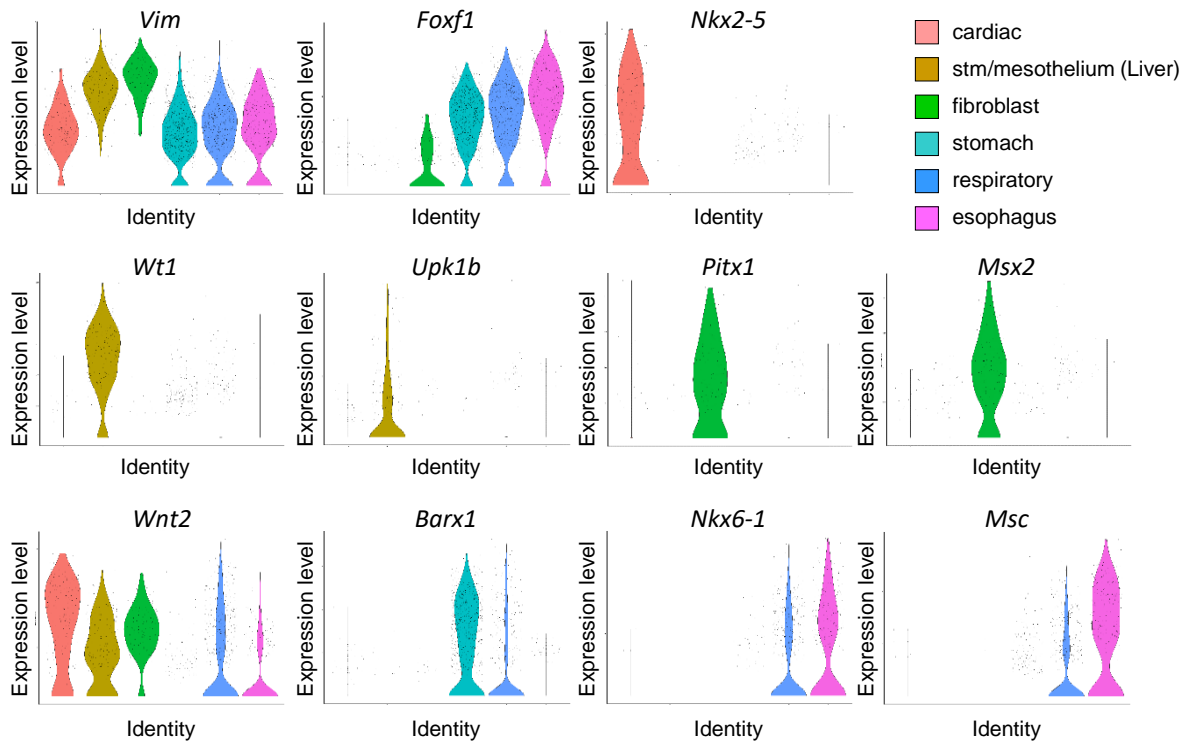

**b**

| Organ-specific mesoderm | Marker genes                     |
|-------------------------|----------------------------------|
| Liver STM/Mesothelium   | <i>Wt1, Upk1b, Gata4, Tbx18</i>  |
| Liver fibroblasts       | <i>Pitx1, Krt19, Msx1, Msx2</i>  |
| Gastric mesoderm        | <i>Barx1, Nkx3-2, Foxf1</i>      |
| Respiratory mesoderm    | <i>Nkx6-1, Tbx5, Wnt2, Foxf1</i> |
| Esophageal mesoderm     | <i>Nkx6-1, Msc, Wnt4, Foxf1</i>  |

**c**

Surface marker gene expression in mesoderm at mouse E9.5

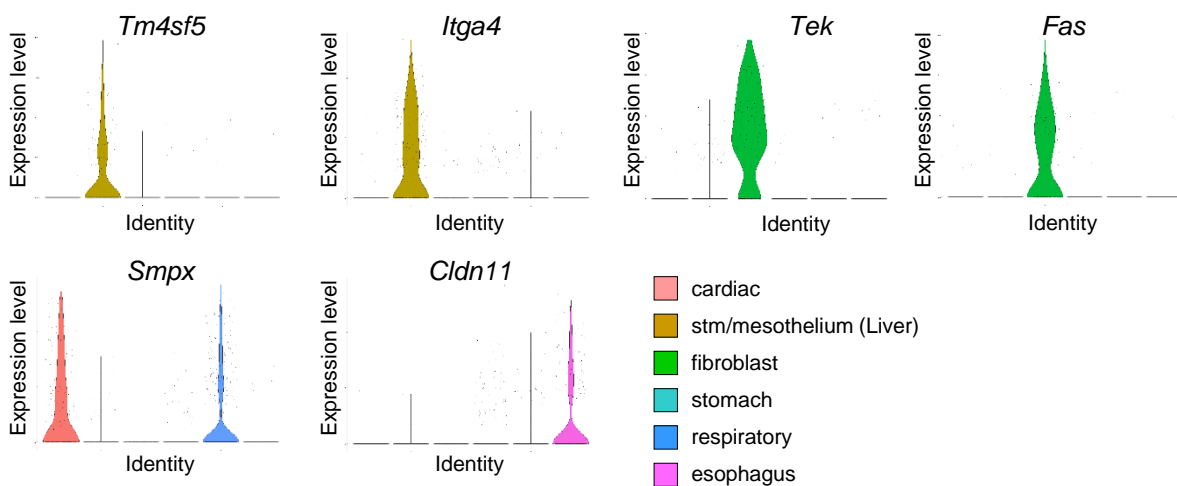

## Supplementary Fig. 1

**a**, The violin plots display the sc-RNA-seq expression of organ-specific mesenchyme markers in different mouse embryonic mesoderm cell populations at E9.5. **b**, Summary of combinatorial marker gene expression from the mouse foregut that were used to define the different hPSC-derived cell types. **c**, The violin plots display the expression of organ-specific mesenchymal surface markers in mouse embryonic mesoderm at E9.5. The plasma membrane genes (1,917 genes) were extracted from the human protein atlas (<https://www.proteinatlas.org/>). Among these genes, 390 genes were overlapped with differentially expressed genes in mesoderm at E9.5. Representative organ-specific mesoderm markers are shown.

# Supplementary Figure 2

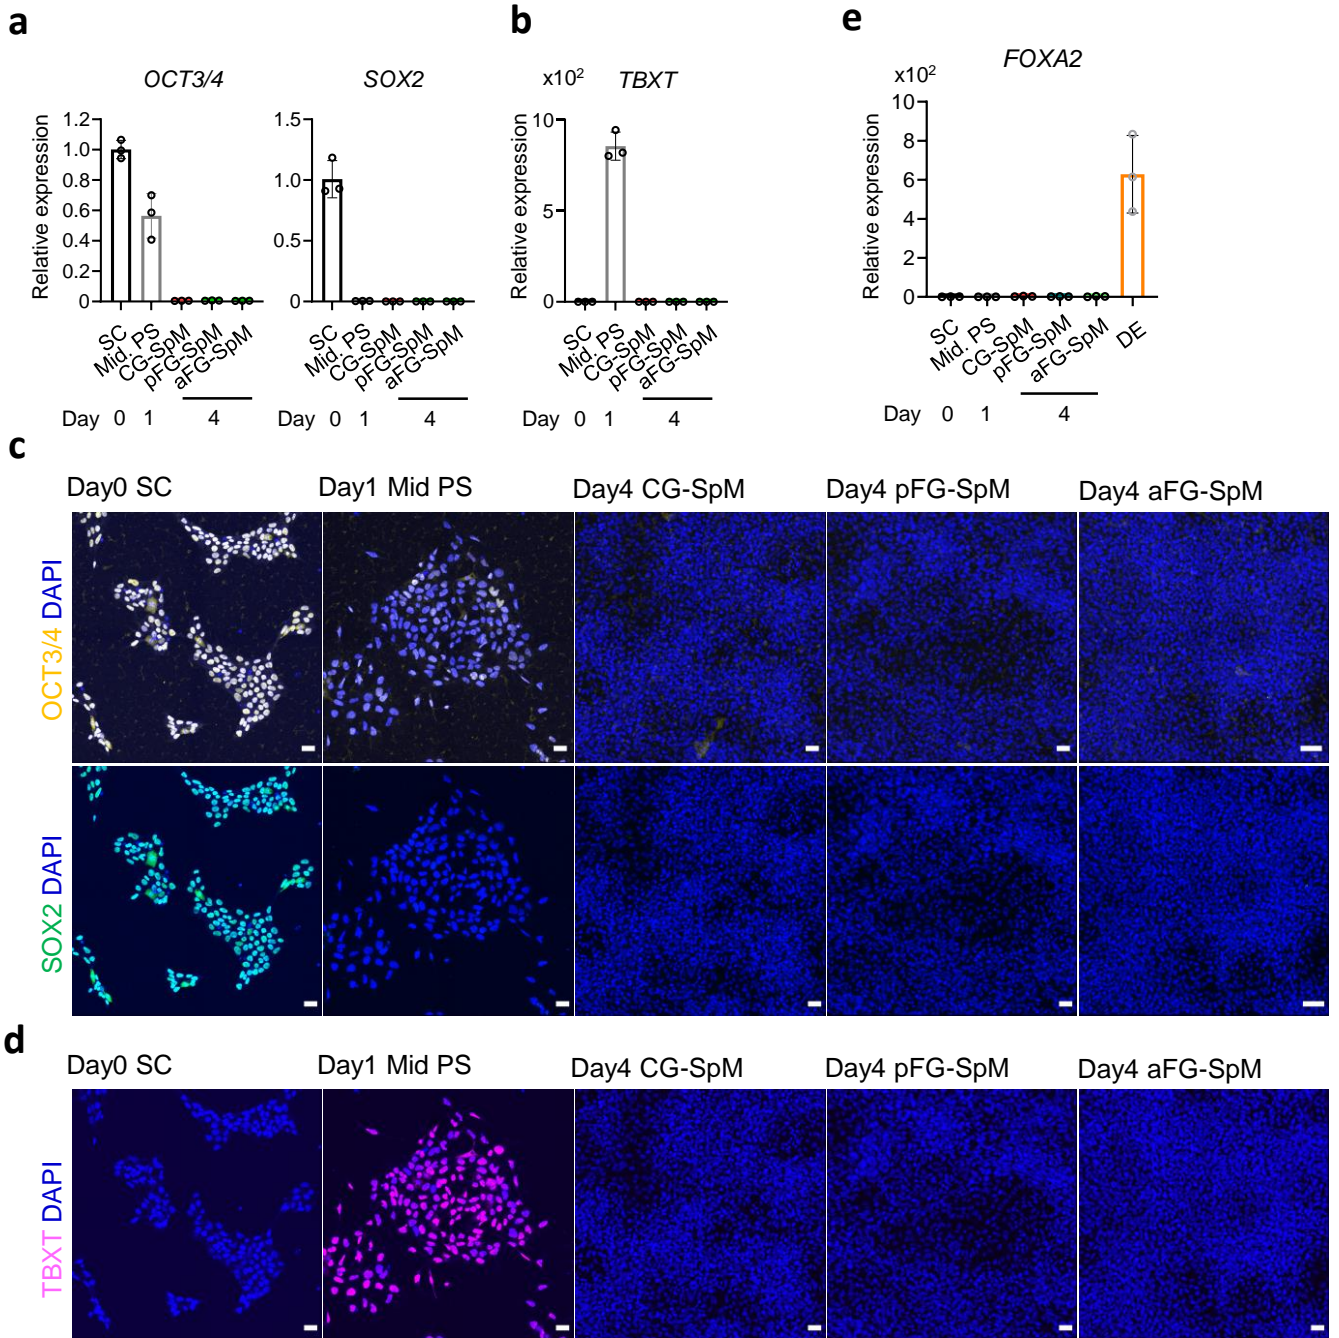

## Supplementary Fig. 2

**a**, Relative mRNA expression of pluripotent marker genes, *OCT3/4* and *SOX2* by quantitative RT-PCR from day0 to day4. **b**, Relative mRNA expression of *TBXT* as an early mesoderm marker by quantitative RT-PCR from day0 to day4. **c**, Immunostaining for *OCT3/4* (yellow) and *SOX2* (green). **d**, Immunostaining for *TBXT* (red). The images in **c** and **d** are maximum intensity projection of confocal stacks. **e**, Relative mRNA expression of *FOXA2* as an endoderm marker by quantitative RT-PCR from day0 to day4. Each bar indicates the average from the 3 independent wells with standard deviation. Scale bar; 50 $\mu$ m

# Supplementary Figure 3

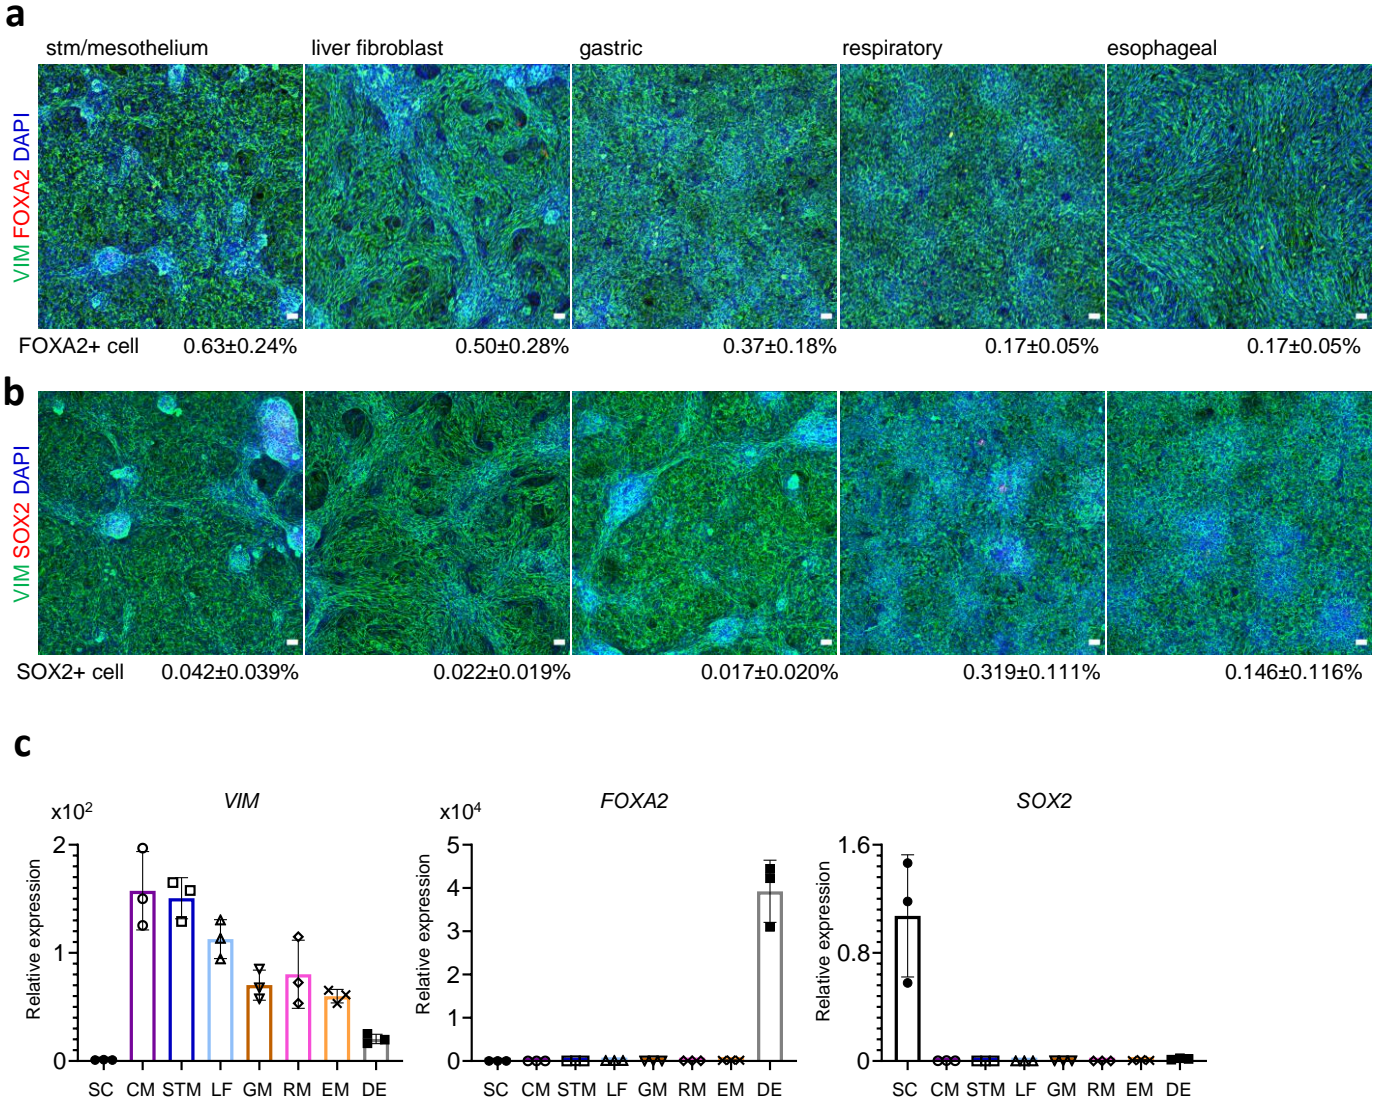

## Supplementary Fig. 3

**a**, Immunostaining for VIM (green), FOXA2 (red), and DAPI (blue) at day7 mesenchyme. **b**, Immunostaining for VIM (green), SOX2 (red), and DAPI (blue) at day7 mesenchyme. The images in a and b are maximum intensity projection of confocal stacks. **c**, Relative mRNA expression of pan-mesoderm marker, VIM, endoderm marker, FOXA2, and ectoderm marker, SOX2, by quantitative RT-PCR. Each bar indicates the average from the 3 independent wells with standard deviation. Scale bar; 50µm (a, b).
